# Supplementary material for: Facile synthesis of the dendritic structure of silver nanoparticles–chitosan and its application as an effective SERS substrate
Source: Royal Society of Chemistry journal article supplement (doi:10.1039/c4nj00841c), 2014-08-28
Supplement: c4nj00841c1.pdf [file c4nj00841c1.pdf]

## 1 Supplementary Material

2

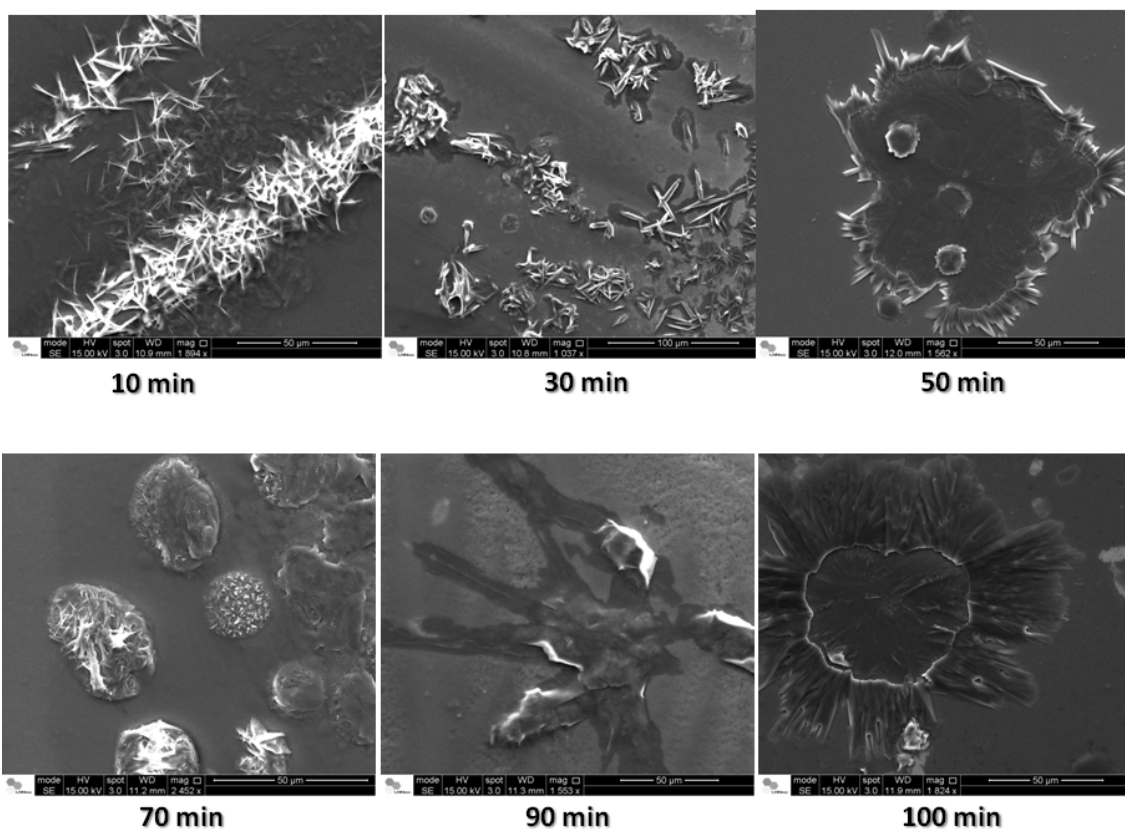

3

4 **Figure S1.** SEM images showing the evolution of the D-AgNP@Chit morphologies

5 during the synthesis.

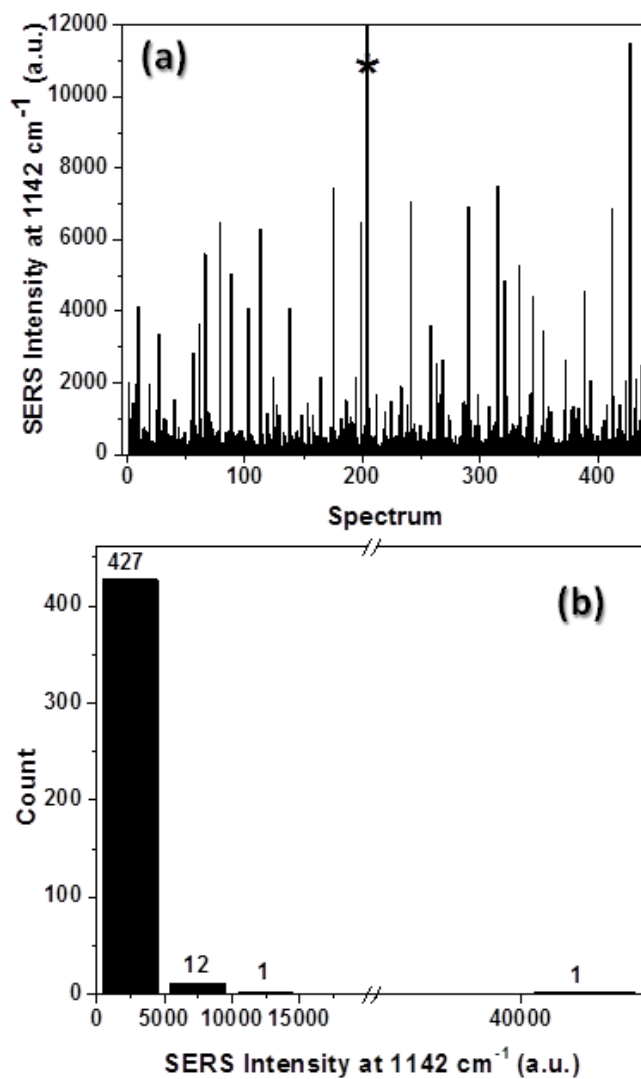

7

8 **Figure S2.** (a) Spatial distribution of the SERS intensity at  $1142\text{ cm}^{-1}$  of 4-ABT ( $10^{-6}$   
 9  $\text{mol L}^{-1}$ ) on the Film 3D. For best viewing the intensity scale was stopped at 12000 a.u.  
 10 and the highest intensity is indicate using an asterisk (\*). (b) Histogram of of the SERS  
 11 intensity at  $1142\text{ cm}^{-1}$ .

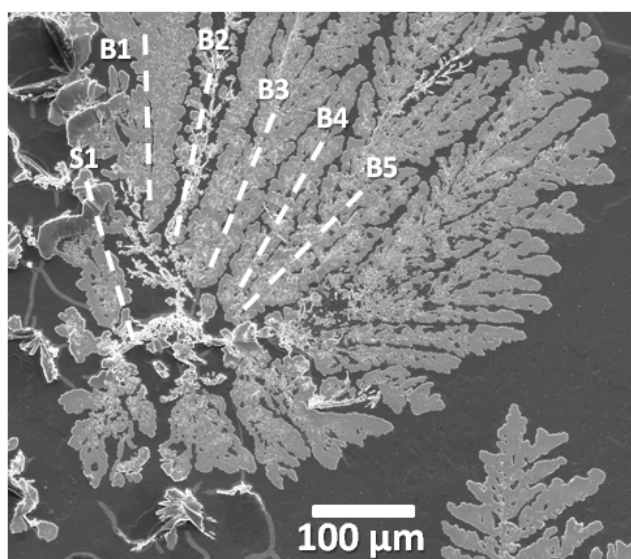

13

14 **Figure S3.** SEM image of D-AgNP@Chit structure for the Film 3D showing the points-  
15 line scan analyzed by Raman spectroscopy.

16
